# Supplementary material for: Identification of missed viruses by metagenomic sequencing of clinical respiratory samples from Kenya
Source: PubMed Central journal article supplement (PMC8742071; doi:10.1038/s41598-021-03987-1), 2022-01-07
Supplement: 41598_2021_3987_MOESM2_ESM.pdf [file 41598_2021_3987_MOESM2_ESM.pdf]

# Supplementary Figure S2

## Sample source

- Household member
- Patient

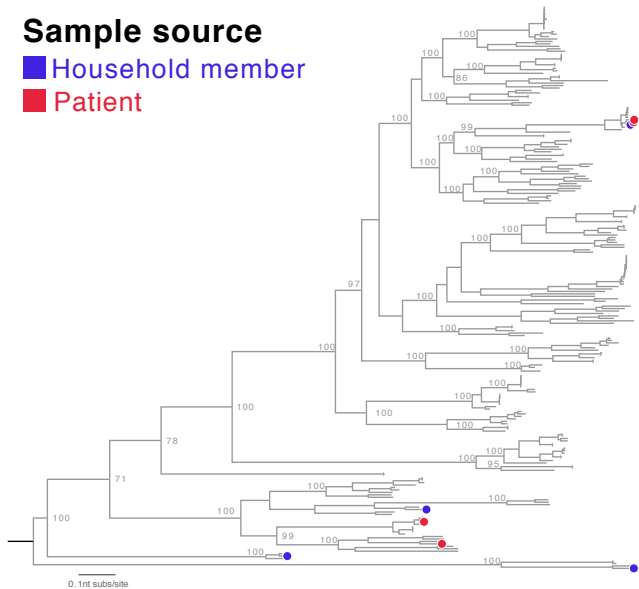

**A - ML tree HRV-A**

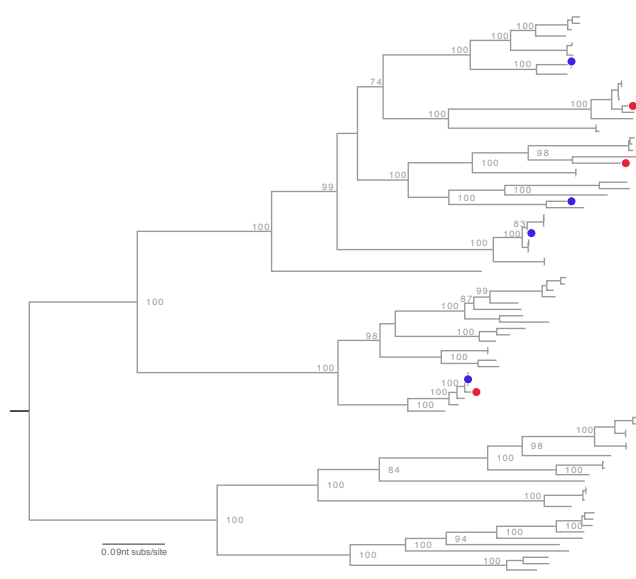

**B - ML tree HRV-B**

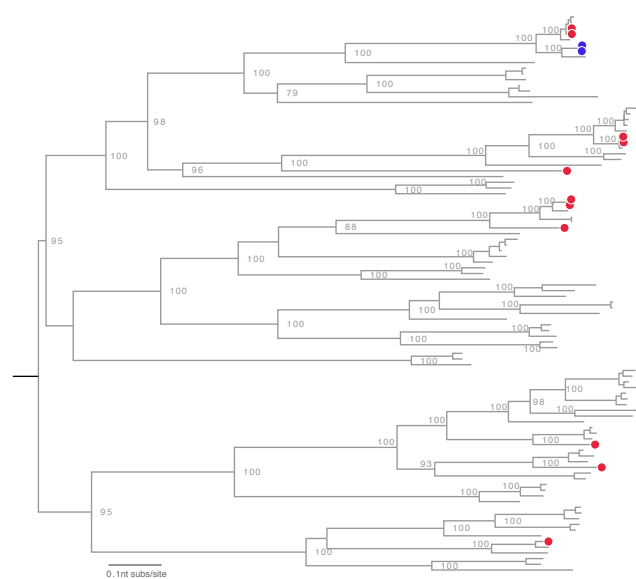

**C - ML tree HRV-C**

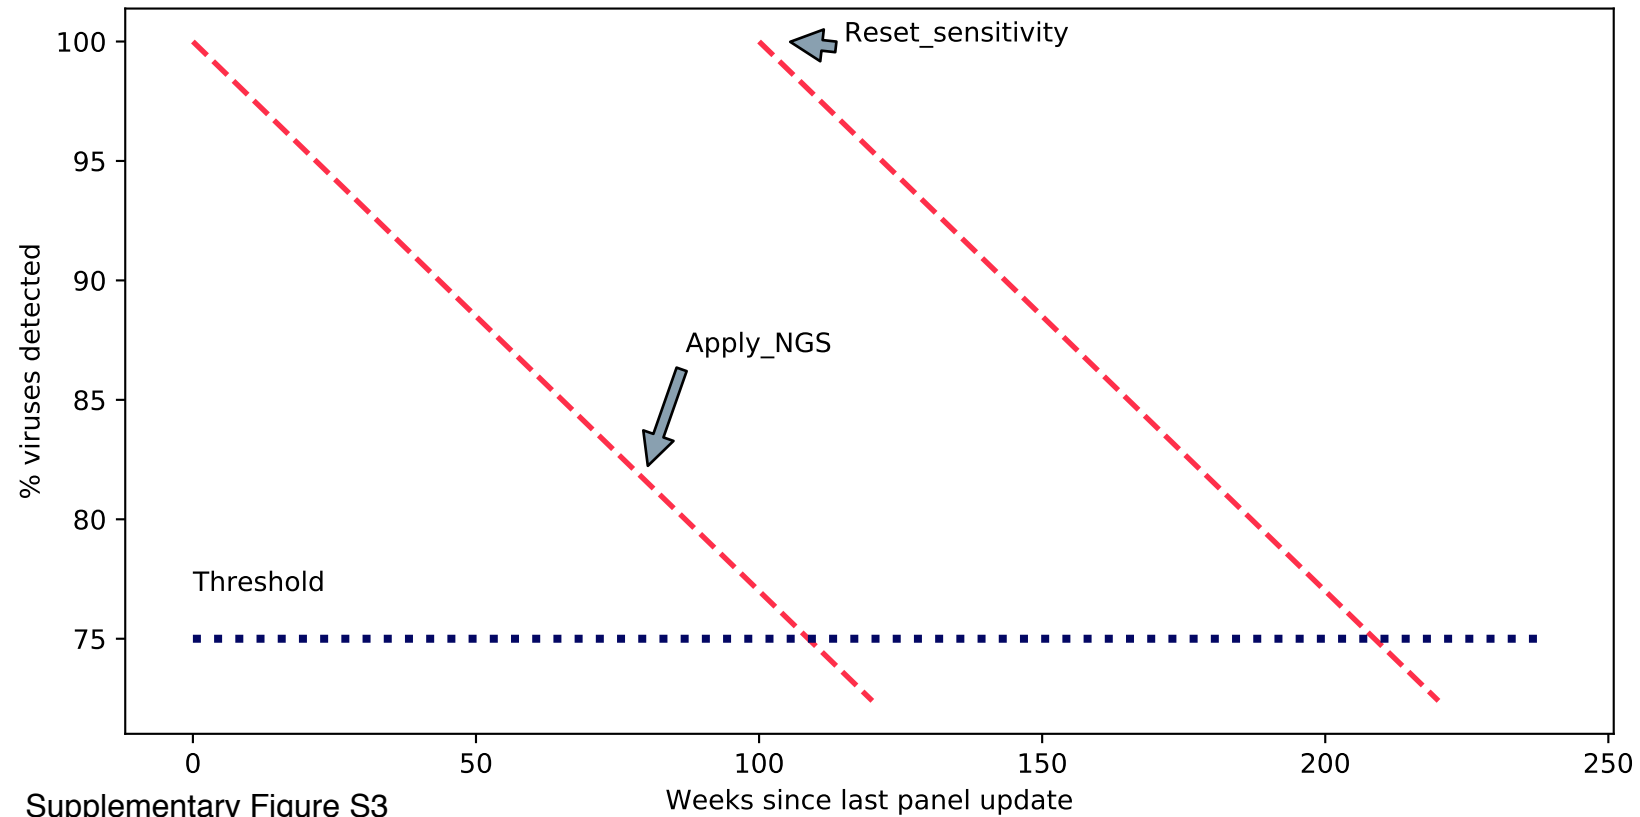

Supplementary Figure S3

**Supplementary Table 1. List of diagnostic primers and probes used in the local respiratory viruses screening assays.**

| Target # | Organism             | Target              | Sequence (5' to 3')                                                                                    | 5' Modification | 3' Modification  | Reference              |
|----------|----------------------|---------------------|--------------------------------------------------------------------------------------------------------|-----------------|------------------|------------------------|
| 1        | Influenza A          | Matrix              | F, AAGACAAGACCAATYCTGTCCACCTCT<br>R, TCTACGYTGACAGTCCYCGCT<br>P, TYACGCTCACCGTCCAGTG                   | -<br>-<br>FAM   | -<br>-<br>BHQ1   | (1) Gunson et al, 2010 |
| 2        | Influenza B          | NS                  | F, ATGATCTTACAGTGGAGGATGAAGAA<br>R, CGAATTGGCTTGRATGTCCTT<br>P, ATGGCCATCGGATCCTCAAYCACTCT             | -<br>-<br>CY5   | -<br>-<br>BHQ2   | (2) Gunson et al, 2011 |
| 3        | Influenza C          | Matrix              | F, GGCAAGCGACATGCTGAAYA<br>R, TCCAGCTGCYTTCAATTGCTTT<br>P, CTCTTCTTCTGATTTTTTCAAA                      | -<br>-<br>VIC   | -<br>-<br>MGBNFQ | (2) Gunson et al, 2011 |
| 4        | HMPV A               | Fusion              | F, GCGYAGCTTCAGTCAATTCAA<br>R, TCCAGCATTGTCTGAAAATTGC<br>P, CAACATTAGAAAACCTTCT                        | -<br>-<br>VIC   | -<br>-<br>MGBNFQ | (2) Gunson et al, 2011 |
| 5        | HMPV B               | Fusion              | F, GCGYAGCTTCAGTCAATTCAA<br>R, GTTATCCCTGCATTGTCTGAAAAT<br>P, CGCACAACTTAGGAATCTTCT                    | -<br>-<br>VIC   | -<br>-<br>MGBNFQ | (2) Gunson et al, 2011 |
| 6        | PIV-1                | HN                  | F, GTGATTTAAACCCGTAATTTCTCA<br>R, CCTTGTCTGCAGCTATTACAGA<br>P, ACCTATGACATCAACGAC                      | -<br>-<br>FAM   | -<br>-<br>MGBNFQ | (2) Gunson et al, 2011 |
| 7        | PIV-2                | HN                  | F, ATGAAAACCTTACCTAAGTGATGGA<br>R, CCTCCYGGTATRGACGACTGAAC<br>P, TCAATCGCAAAAGC                        | -<br>-<br>VIC   | -<br>-<br>MGBNFQ | (2) Gunson et al, 2011 |
| 8        | PIV-3                | HN                  | F, CCAGGGATATAYTAYAAAGGCAAAA<br>R, CCGGRCACCCAGTTGTG<br>P, TGGRTTCAAGACCTCCATAYCCGAGAAA                | -<br>-<br>FAM   | -<br>-<br>BHQ1   | (2) Gunson et al, 2011 |
| 9        | PIV-4                | Fusion              | F, CAGAYAACATCAATCGCCTTACAAA<br>R, TGTACTATGACTGCCCAAAA<br>P, CCMATCACAAAGCTCAGAAATYCAAAAGTCGT         | -<br>-<br>CY5   | -<br>-<br>BHQ2   | (2) Gunson et al, 2011 |
| 10       | HCoV 229E            | Nucleocapsid        | F, CAGTCAAATGGGCTGATGCA<br>R, AAAGGGCTATAAAGAGAATAAAGGTATTCT<br>P, CCCTGACGACCAGTTGTGGTTCA             | -<br>-<br>FAM   | -<br>-<br>BHQ1   | (2) Gunson et al, 2011 |
| 11       | HCoV OC43            | Nucleocapsid        | F, CGATGAGGCTATCCGACTAGGT<br>R, CCTTCTGAGCCTTCAATATAGTAACC<br>P, TCCGCTGGCAGGTAATCCCT                  | -<br>-<br>CY5   | -<br>-<br>BHQ3   | (2) Gunson et al, 2011 |
| 12       | HCoV NL63            | 1a gene             | F, ACGTACTTCTATTATGAAGCATGATTTAA<br>R, AGCAGATCTAATGTTACTTAAAACTACG<br>P, ATTGCCAAGGCTCTAAACGTACAGGTGT | -<br>-<br>VIC   | -<br>-<br>TAMRA  | (2) Gunson et al, 2011 |
| 13       | RSV A                | NP                  | F, AGATCAACTTCTGTATCCAGCAA<br>R, TTCTGCACATCATAATTAGGAG<br>P, CACCATCCAACGGAGCAGGAGAT                  | -<br>-<br>FAM   | -<br>-<br>BHQ1   | (2) Gunson et al, 2011 |
| 14       | RSV B                | NP                  | F, GCATCATTGCTGCTTAATCAATT<br>R, GGTGTACTCTRACTCTCCATTATG<br>P, TCAAGTGTGCTYTAGGYAATGCAGC              | -<br>-<br>VIC   | -<br>-<br>TAMRA  | (3) Kamau et al, 2017  |
| 15       | HRV                  | 5'UTR               | F, TGGACAGGGTGTGAAGAGC<br>R, CAAAGTAGTCCGTCCTCCATCC<br>P, TCCTCGGCCCTGAATG                             | -<br>-<br>VIC   | -<br>-<br>TAMRA  | (2) Gunson et al, 2011 |
| 16       | Adv                  | Matrix              | F, GCCACGGTGGGGTTCTAAACT<br>R, GCCCCAGTGGTCTTACATGCATC<br>P, TGCACCAGACCCGGGCTCAGTACTCCGA              | -<br>-<br>CY5   | -<br>-<br>BHQ2   | (2) Gunson et al, 2011 |
| 17       | <i>M. pneumoniae</i> | Cytoadhesin P1 gene | F, AAGCAGGAGTGACGGAAACAC<br>R, CACCACATCATTCCCGTATT<br>P, CTCACCAACAACCTCGGCCTA                        | -<br>-<br>CY5   | -<br>-<br>BHQ2   | (2) Gunson et al, 2011 |

**Abbreviations**

FAM=6-carboxyfluorescein;BHQ= black hole quencher; NS=nonstructural; HN=hemagglutinin; NP=nucleoprotein; UTR=untranslated region; PIV=parainfluenza virus; HCoV=human coronavirus; RSV=respiratory syncytial virus; Adv=Adenovirus; HMPV=human metapneumovirus;

**References**

(1) Gunson R, Maclean A, Davies E, Bennett S, Miller R, Carman WF. Development of a multiplex real-time RT-PCR that allows universal detection of influenza A viruses and simultaneous typing of influenza A/H1N1/2009 virus. *J Virol Methods*. 2010 Feb;163(2):258-61. doi: 10.1016/j.jviromet.2009.10.006. Epub 2009 Oct 23. PubMed PMID: 19854220.

(2) Gunson RN, Carman WF. During the summer 2009 outbreak of "swine flu" in Scotland what respiratory pathogens were diagnosed as H1N1/2009? *BMC Infect Dis*. 2011 Jul 13;11:192. doi: 10.1186/1471-2334-11-192. PubMed PMID: 21752259; PubMed Central PMCID: PMC3146830.

(3) Kamau E, Agoti CN, Lewa CS, Oketch J, Owor BE, Otieno GP, Bett A, Cane PA, Nokes DJ. Recent sequence variation in probe binding site affected detection of respiratory syncytial virus group B by real-time RT-PCR. *J Clin Virol*. 2017 Mar;88:21-25. doi: 10.1016/j.jcv.2016.12.011. Epub 2017 Jan 5. PubMed PMID: 28107671; PubMed Central PMCID: PMC5331890.

**Supplementary Table 2. List of all viral sequences identified with corresponding GenBank accession number and crude read depth coverage.**

| Sample ID | Virus                 | Virus Abbreviation | Genome crude coverage* | Genome length | GenBank accession number |
|-----------|-----------------------|--------------------|------------------------|---------------|--------------------------|
| 20692_1   | Rhinovirus_A          | HRV-A              | 3.441                  | 6,822nt       | MK989733                 |
| 20692_1   | RSVB                  | RSVB               | 253.603                | 15,287nt      | MK989761                 |
| 20692_3   | Parvovirus_B19        | B19                | 10.102                 | 5,593nt       | MK989716                 |
| 20692_6   | Rhinovirus_C          | HRV-C              | 240.805                | 7,113nt       | MK989748                 |
| 20692_7   | RVi_KEN_2B            | RVi                | 13.758                 | 9,770nt       | MK989764                 |
| 20692_18  | Rhinovirus_C          | HRV-C              | 586.337                | 7,121nt       | MK989749                 |
| 20692_20  | RSVB                  | RSVB               | 20.176                 | 15,262nt      | MK989762                 |
| 20692_25  | Enterovirus_D68       | EV-D68             | 105.957                | 7,261nt       | MK989723                 |
| 20692_31  | Rhinovirus_C          | HRV-C              | 8.626                  | 6,651nt       | MK989750                 |
| 20692_33  | Rhinovirus_B          | HRV-B              | 9.832                  | 7,059nt       | MK989741                 |
| 20692_39  | Rhinovirus_C          | HRV-C              | 11.381                 | 7,107nt       | MK989751                 |
| 20692_42  | HMPV                  | HMPV               | 19.71                  | 13,234nt      | MK989730                 |
| 20692_43  | Enterovirus_D68       | EV-D68             | 24.48                  | 7,251nt       | MK989724                 |
| 20692_44  | Rhinovirus_A          | HRV-A              | 53.015                 | 7,166nt       | MK989734                 |
| 20692_48  | Rhinovirus_B          | HRV-B              | 21.809                 | 6,879nt       | MK989742                 |
| 20692_51  | Rhinovirus_C          | HRV-C              | 5.99                   | 7,021nt       | MK989760                 |
| 20692_52  | Rhinovirus_A          | HRV-A              | 28.979                 | 7,118nt       | MK989735                 |
| 20692_52  | Enterovirus_D68       | EV-D68             | 9.101                  | 7,328nt       | MK989725                 |
| 20692_55  | Poliovirus            | Polio              | 20.16                  | 7,397nt       | MK989713                 |
| 20692_57  | Rhinovirus_A          | HRV-A              | 147.094                | 7,051nt       | MK989736                 |
| 20692_62  | RSVB                  | RSVB               | 29.037                 | 15,367nt      | MK989763                 |
| 20692_64  | Bocavirus             | HBoV               | 100.277                | 5,533nt       | MK989727                 |
| 20692_64  | Rhinovirus_B          | HRV-B              | 4.871                  | 7,204nt       | MK989743                 |
| 20692_81  | Rhinovirus_C          | HRV-C              | 9.21                   | 6,919nt       | MK989752                 |
| 20692_83  | Rhinovirus_C_contig1  | HRV-C              | 314.609                | 7,103nt       | MK989753                 |
| 20692_83  | Rhinovirus_C_contig2  | HRV-C              | 33.611                 | 4,195nt       | MK989754                 |
| 20692_88  | Coxsackievirus_A16    | CV-A16             | 214.343                | 7,411nt       | MK989714                 |
| 20692_88  | Enterovirus_D68       | EV-D68             | 35.684                 | 7,288nt       | MK989726                 |
| 20692_90  | Rhinovirus_C          | HRV-C              | 79.665                 | 7,086nt       | MK989755                 |
| 20692_92  | RVi_KEN_2B            | RVi                | 5.678                  | 9,588nt       | MK989765                 |
| 20692_93  | Rhinovirus_C          | HRV-C              | 151.153                | 7,151nt       | MK989756                 |
| 20692_95  | Rhinovirus_C          | HRV-C              | 14.438                 | 7,103nt       | MK989757                 |
| 20693_1   | Rhinovirus_A          | HRV-A              | 5.934                  | 7,087nt       | MK989737                 |
| 20693_9   | Coxsackievirus_A24    | CV-A24             | 6.018                  | 7,326nt       | MK989717                 |
| 20693_11  | Bocavirus             | HBoV               | 11.358                 | 5,497nt       | MK989728                 |
| 20693_14  | HMPV                  | HMPV               | 7.99                   | 13,303nt      | MK989731                 |
| 20693_16  | Rhinovirus_A          | HRV-A              | 42.407                 | 6,866nt       | MK989738                 |
| 20693_21  | Rhinovirus_B          | HRV-B              | 3.24                   | 6927nt        | MK989744                 |
| 20693_45  | Rhinovirus_A          | HRV-A              | 10.051                 | 7,059nt       | MK989739                 |
| 20693_49  | Coxsackievirus_A24    | CV-A24             | 36.418                 | 7,389nt       | MK989718                 |
| 20693_57  | Rhinovirus_B          | HRV-B              | 4.526                  | 7,068nt       | MK989745                 |
| 20693_58  | Rhinovirus_A          | HRV-A              | 164.936                | 7,043nt       | MK989740                 |
| 20693_59  | Rhinovirus_B          | HRV-B              | 216.215                | 7,249nt       | MK989746                 |
| 20693_61  | HMPV                  | HMPV               | 13.172                 | 13,329nt      | MK989732                 |
| 20693_66  | Coxsackievirus_A24    | CV-A24             | 12.071                 | 7,422nt       | MK989719                 |
| 20693_67  | Coxsackievirus_A24    | CV-A24             | 14.581                 | 7,396nt       | MK989720                 |
| 20693_68  | Human_parainfluenza_1 | HPIV-1             | 232.83                 | 15,560nt      | MK989715                 |
| 20693_74  | Bocavirus             | HBoV               | 9.595                  | 5,512nt       | MK989729                 |
| 20693_82  | Rhinovirus_B          | HRV-B              | 13.571                 | 7,186nt       | MK989747                 |
| 20693_83  | Rhinovirus_C          | HRV-C              | 143.663                | 7,135nt       | MK989758                 |
| 20693_84  | Coxsackievirus_A24    | CV-A24             | 32.712                 | 7,477nt       | MK989721                 |
| 20693_86  | Rhinovirus_C          | HRV-C              | 4.371                  | 6965nt        | MK989759                 |
| 20693_94  | Coxsackievirus_A24    | CV-A24             | 31.566                 | 7,307nt       | MK989722                 |

\*Depth of sequence coverage was calculated as number of reads mapping with Bowtie2 [28] with "--very-sensitive-local" mapping | to detect possible cross-talk sequences.

28. Langmead, B. & Salzberg, S. L. Fast gapped-read alignment with Bowtie2. *Nat. Methods* 9, 357–359 (2012).
